# Supplementary material for: Enforced PGC-1α expression promotes CD8 T cell fitness, memory formation and antitumor immunity
Source: PubMed Central journal article supplement (PMC8245409; doi:10.1038/s41423-020-0365-3), 2020-02-13

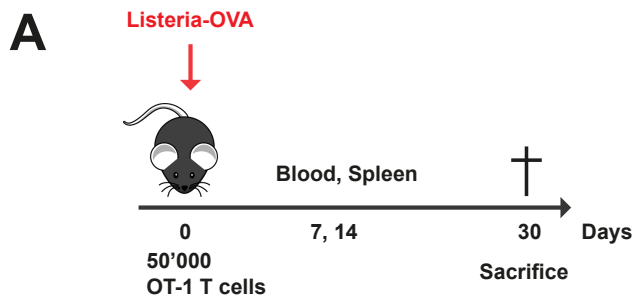

**B** Day 30 Spleen Frequencies of transferred cells

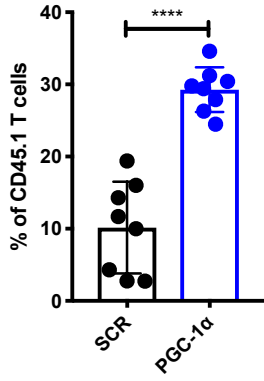

**C** Day 30 Spleen Mitochondrial respiration

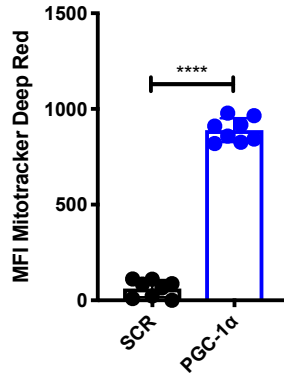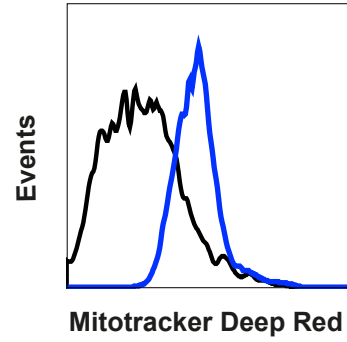

**D**

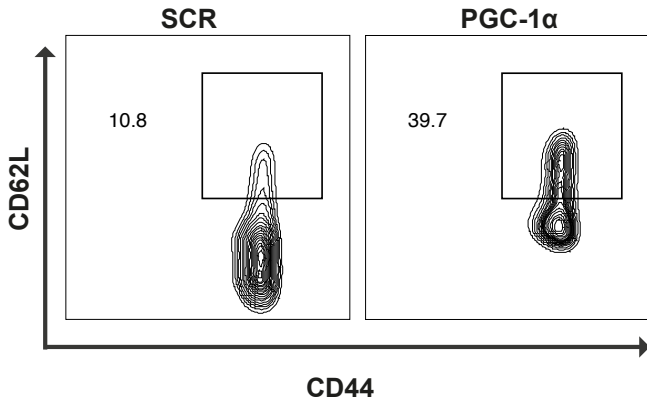

**E**

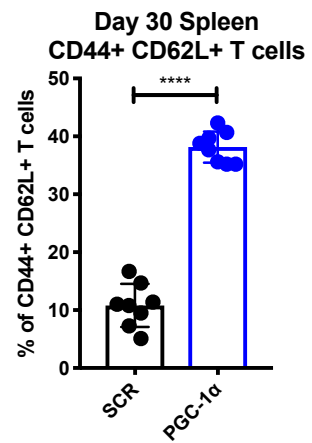

**F**

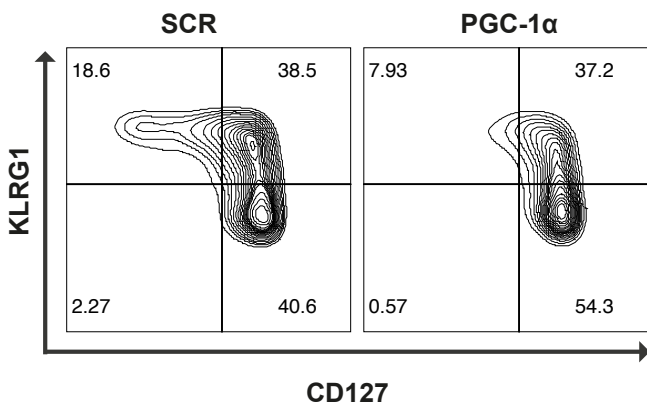

**G**

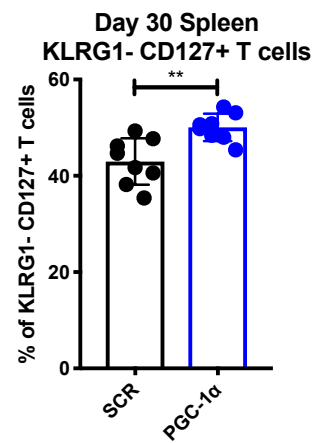

Supplement: 41423_2020_365_MOESM4_ESM.pdf [file 41423_2020_365_MOESM4_ESM.pdf]
